# Supplementary material for: Dehydrogenation of methylcyclohexane over Pt-based catalysts supported on functional granular activated carbon
Source: Royal Society of Chemistry journal article supplement (doi:10.1039/d1ra05480e), 2021-01-01
Supplement: d1ra05480e1.pdf [file d1ra05480e1.pdf]

## Supplementary Information

### Dehydrogenation of methylcyclohexane over Pt-based catalysts supported on functional granular activated carbon

Hong-Li Ye,<sup>a,b</sup> Shuang-Xi Liu,<sup>b,c</sup> Cui Zhang,<sup>b,c,\*</sup> You-Qiong Cai,<sup>a</sup> and Yong-Fu Shi,<sup>a,\*</sup>

<sup>a</sup>Laboratory of Aquatic Product Quality, Safety and Processing, East China Sea Fisheries Research Institute, Chinese Academy of Fishery Sciences, Shanghai, 200090, China

<sup>b</sup>Institute of New Catalytic Materials Science and MOE Key Laboratory of Advanced Energy Materials Chemistry, School of Materials Science and Engineering, National Institute of Advanced Materials, Nankai University, Tianjin 300350, China

<sup>c</sup>Collaborative Innovation Center of Chemical Science and Engineering (Tianjin), Tianjin 300072, China

\*Corresponding author E-mails: zhangcui@nankai.edu.cn. (C. Zhang); shiyf@ecsf.ac.cn. (Y. Shi)

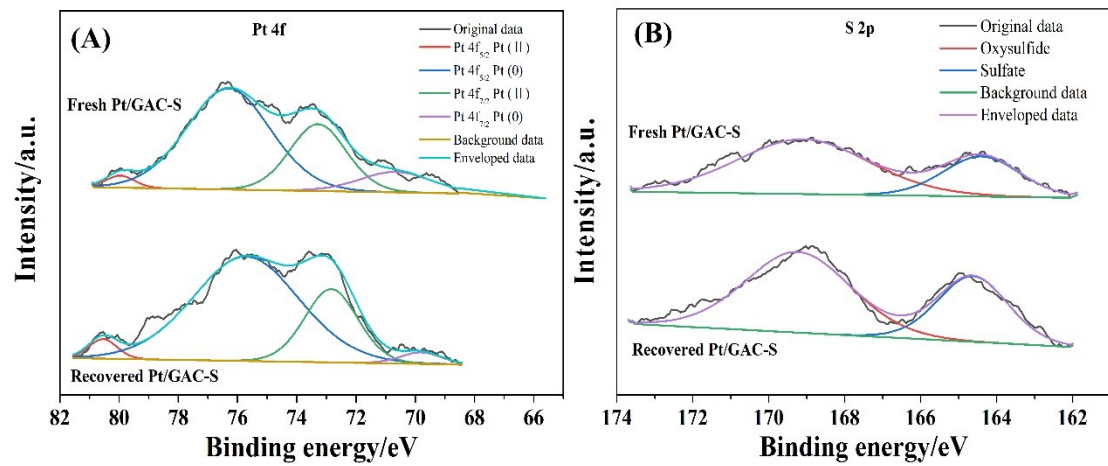

**Fig. S1.** (A) Pt 4f XPS spectra of the fresh Pt/GAC-S catalyst and the recovered Pt/GAC-S catalyst;

(B) S 2p XPS spectra of the fresh Pt/GAC-S catalyst and the recovered Pt/GAC-S catalyst.
